# Supplementary material for: Is artificial intelligence for everyone? Analyzing the role of ChatGPT as a writing assistant for medical students
Source: Frontiers journal article supplement (doi:10.3389/feduc.2024.1457744), 2024-12-11
Supplement: Presentation_1.pdf [file Presentation_1.pdf]

## Appendix A

### Similarities between psychologist and psychiatrist

There are several similarities between psychologist and psychiatrist. Both of them try to treat mental and psychological problems by talking with person and lecture as psychiatrists. Because of their works are very near to each other, most of their lectures are same. Psychiatrist works are very like psychiatrists in that they are asking a many question about the personality and lifestyle, family and... from patient. Then they can them. Both of them behavior with patients like friend. Also both of them are same in their study lectures, behavior with patients, solutions and... but they have the differences between them.

Here is the edited version of your text:

There are several similarities between psychologists and psychiatrists. Both of them aim to treat mental and psychological problems through therapeutic conversations and counseling. Because their work is closely related, many of their treatment approaches overlap. Psychiatrists, like psychologists, engage in extensive questioning about a patient's personality, lifestyle, family, and other relevant aspects. They both establish a friendly rapport with their patients and provide similar study materials, behavioral approaches, and solutions. However, despite these similarities, there are distinct differences between psychologists and psychiatrists.

### Explanation of changes:

1. "Lecture" has been changed to "counsel" to reflect the therapeutic nature of their interactions with patients.
2. "Because of their works are very near to each other" has been modified to "Because their work is closely related" for better clarity and conciseness.
3. "Most of their lectures are same" has been rephrased to "Many of their treatment approaches overlap" to convey the idea that there is shared ground in their therapeutic methods.
4. "Psychiatrist works are very like psychiatrists" has been revised to "Psychiatrists, like psychologists" to maintain consistency and avoid redundancy.
5. "Then they can them" has been removed as it is unclear what it refers to.
6. "Both of them behavior with patients like friend" has been changed to "They both establish a friendly rapport with their patients" to improve clarity and grammar.
7. "Also both of them are same in their study lectures, behavior with patients, solutions and..." has been rephrased to "They both provide similar study materials, behavioral approaches, and solutions" to create a more concise and coherent sentence.

۱. کلمه counsel معنای بهتری در جمله میدهد.
۲. تغییر عبارت به خاطر اثربخشی و مفهوم بهتر.
۳. تغییر عبارت برای نشان دادن بهتر مفهوم همپوشانی زیاد دو رشته در زمینه درمانی.
۴. تغییر عبارت به خاطر نشان دادن حالت مقایسه ای و جلوگیری از تکرر.
۵. حذف عبارت بخاطر معلوم نبودن مرجع آن.
۶. تغییر عبارت بخاطر اثربخشی و مفهوم بهتر و همچنین تصحیح گرامری.
۷. تغییر عبارت برای مختصر و منسجم کردن جمله.
